# Supplementary material
Source: Springer Nature journal article supplement (https://www.springermedizin.de/resource/supplementary/12911_2012_543_MOESM1_ESM.pdf/9525798)
Supplement: MOESM1 [file 9525798]

**Additional file 1:** Associations, organisations, and interest groups solicited to participate in the Delphi study

Alberta Netcare

Association québécoise des infirmières et infirmiers en systèmes et technologies de l'information

Association québécoise des archivistes médicales

British Columbia eHealth branch

Canadian Health Information Management Association

Canada's Health Informatics Association

Canada Health Infoway – Clinician Peer Support Network

Canadian Institute for Health Information

Canadian Medical Association

Canadian Patient Safety Institute

Canadian Pharmacists Association

Canadian Society for Telehealth

Cientis Technologies

Dossier de Santé du Québec - *Comité consultatif clinique du projet*

Dossier de Santé du Québec - *Réseau du soutien et validation par les pairs (RSVP)*

eHealth Ontario

Manitoba e-Health Program

National ePharmacy Task Force

Nova Scotia Nursing Informatics Group

Ontario Patient Relations Association

Registered Nurses' Association of Ontario

Saskatchewan Health Information Solutions Centre

Société québécoise d'informatique biomédicale et de la santé
